# Supplementary material for: The nanostructured secretome
Source: Royal Society of Chemistry journal article supplement (doi:10.1039/c9bm01007f), 2019-11-06
Supplement: c9bm01007f1.pdf [file c9bm01007f1.pdf]

**Supporting information for**

**The Nanostructured Secretome**

S. Busatto<sup>1,2,3</sup>, A. Zandrini<sup>4</sup>, A. Radeghieri<sup>1,3</sup>, L. Paolini<sup>1,3</sup>, M. Romano<sup>1</sup>, M. Presta<sup>1</sup>, P. Bergese\*<sup>1,3</sup>.

1. Department of Molecular and Translational Medicine, University of Brescia, 25123 Brescia, Italy

2. Department of Transplantation Medicine; Department of Physiology and Biomedical Engineering,  
Mayo Clinic, Jacksonville, FL 32224, USA

3. CSGI, Research Center for Colloids and Nanoscience, 50019 Florence, Italy

4. Department of Animal Science, Food and Nutrition - Università Cattolica del Sacro Cuore, 29122  
Piacenza, Italy

|                                    |                 |                             | size                        | $\zeta$ -potential (pH 7.4) | $\rho$                                                   |
|------------------------------------|-----------------|-----------------------------|-----------------------------|-----------------------------|----------------------------------------------------------|
| nanosized macromolecular complexes | albumin         |                             | 7.50 nm · 6.50 nm · 4.00 nm | n.r.                        | 1.38 g · cm <sup>-3</sup>                                |
|                                    | transferrin     | Apo                         | 8.02 nm · 4.28 nm · 6.25 nm | n.r.                        | 1.41 g · cm <sup>-3</sup>                                |
|                                    |                 | Holo                        |                             | - 8.20 mV                   |                                                          |
|                                    | ferritin        | Apo                         | 12.00 nm                    | n.r.                        | 1.27 g · cm <sup>-3</sup>                                |
|                                    |                 | Holo                        |                             | n.r.                        | 1.45 g · cm <sup>-3</sup>                                |
| ago-2                              |                 | 9.00 nm · 5.48 nm · 9.16 nm | n.r.                        | n.r.                        |                                                          |
| extracellular vesicles             | small           |                             | 30 nm - 250 nm              | - 15 mV / - 34 mV           | 1.110 g · cm <sup>-3</sup> - 1.1190 g · cm <sup>-3</sup> |
|                                    | large           |                             | 150 nm - 800 nm             | n.r.                        |                                                          |
|                                    | outer membrane  |                             | 30 - 300 nm                 | n.r.                        | n.r.                                                     |
| lipoproteins                       | chylomicrons    |                             | 80 nm - > 500 nm            | - 32.60 ± 3.01 mV           | < 0.950 g cm <sup>-3</sup>                               |
|                                    | VLDL            |                             | 30 nm - 80 nm               | - 25.40 ± 3.82 mV           | 1.006 g · cm <sup>-3</sup> - 0.950 g · cm <sup>-3</sup>  |
|                                    | IDL             |                             | 30 nm - 40 nm               | - 17.40 ± 2.98 mV           | 1.020 g · cm <sup>-3</sup> - 1.006 g · cm <sup>-3</sup>  |
|                                    | LDL             |                             | 20 nm - 30 nm               | -19.25 ± 3.58 mV            | 1.060 g · cm <sup>-3</sup> - 1.020 g · cm <sup>-3</sup>  |
|                                    | HDL             |                             | 5 nm - 10 nm                | - 21.83 ± 4.07 mV           | 1.200 g · cm <sup>-3</sup> - 1.060 g · cm <sup>-3</sup>  |
| milk particles                     | fat globules    |                             | 100 nm - > 1000 nm          | - 7.9 mV / - 11 mV          | ~ 0.92 g · cm <sup>-3</sup>                              |
|                                    | casein micelles |                             | 50 nm - 250 nm              | - 20.1 mV                   | ~ 1.078 g · cm <sup>-3</sup>                             |

**Table S1:** Direct comparison of secNP size,  $\zeta$ -potential at physiological pH and density of nanostructured secretome. Extensive information can be found in the manuscript. For nanosized macromolecular complexes data refer to **Figure 2**; for extracellular vesicles data refer to **Figure 3**; for lipoproteins data refer to **Figure 5**; for milk particles data refer to **Figure 6**. Unknown parameters are here marked as “n.r.” (not reported). Legend:  $\rho$  = density
